# Supplementary material for: Syndiotactic- and heterotactic-specific radical polymerization of N-n-propylmethacrylamide complexed with alkali metal ions
Source: Royal Society of Chemistry journal article supplement (doi:10.1039/c5py00755k), 2015-01-01
Supplement: c5py00755k1.pdf [file c5py00755k1.pdf]

**SUPPLEMENTARY INFORMATION**

**Syndiotactic- and heterotactic-specific radical polymerization of  
*N*-*n*-propylmethacrylamide complexed with alkali metal ions**

**Tomohiro Hirano,<sup>a\*</sup> Tadashi Segata,<sup>a</sup> Junpei Hashimoto,<sup>a</sup> Yohei Miwa,<sup>b</sup> Miyuki  
Oshimura<sup>a</sup> and Koichi Ute<sup>a</sup>**

<sup>a</sup>Department of Chemical Science and Technology, Institute of Technology and Science,  
Tokushima University, 2-1 Minamijosanjima, Tokushima 770-8506, Japan

<sup>b</sup>Department of Chemistry and Biomolecular Science, Faculty of Engineering, Gifu  
University, Yanagido, Gifu 501-1193, Japan

\*Corresponding author. E-mail: hirano@tokushima-u.ac.jp

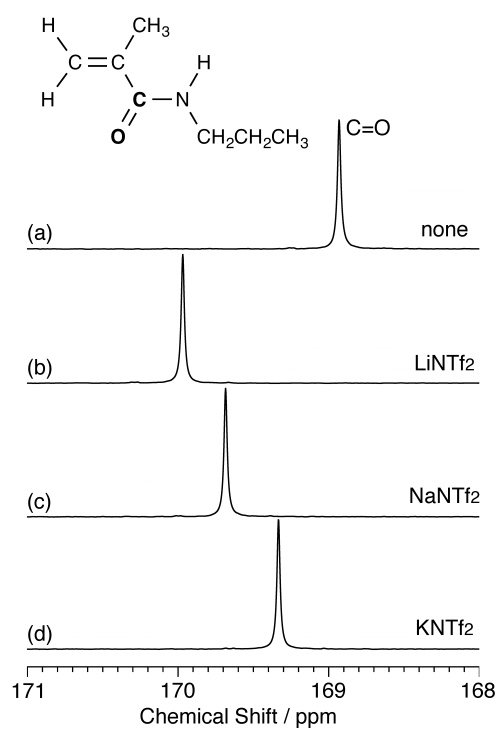

**Fig. S1.** Expanded  $^{13}\text{C}$  NMR spectra of the C=O carbons of NNPMAAm ( $2.0 \text{ mol}\cdot\text{L}^{-1}$ ) in the presence or absence of a 0.5 mole equivalent of MNTf<sub>2</sub> measured in CD<sub>3</sub>CN at 0 °C.

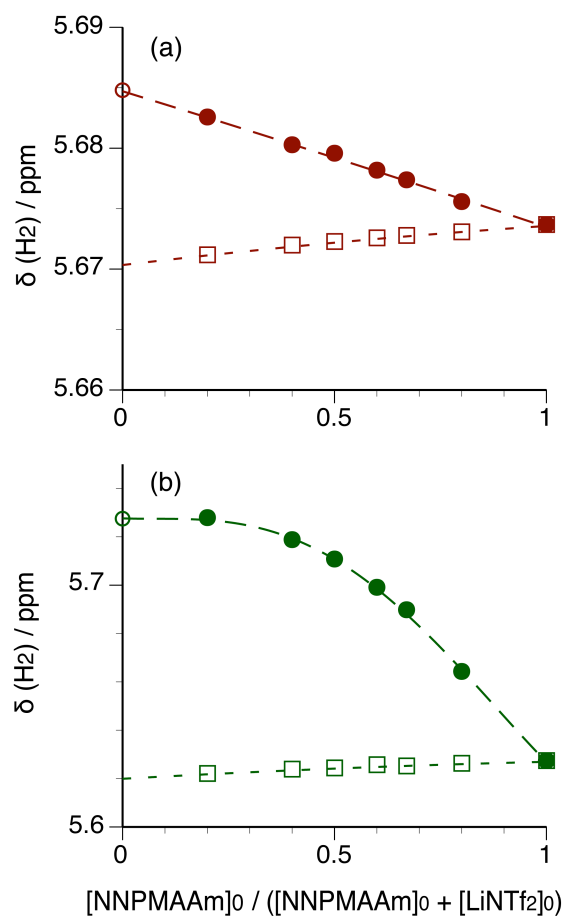

**Fig. S2.** Changes in the chemical shifts of the H<sub>2</sub> proton in the vinylidene group of NNPMAAm in the presence of LiNTf<sub>2</sub> in (a) CD<sub>3</sub>OD and in (b) CD<sub>3</sub>CN at 0 °C ( $[\text{NNPMAAm}]_0 + [\text{LiNTf}_2]_0 = 0.25 \text{ mol}\cdot\text{L}^{-1}$ ). The plots marked (□) denote the chemical shifts of DMAAm alone at the corresponding concentration, whereas those marked (●) denote the chemical shifts for the saturated mixtures.

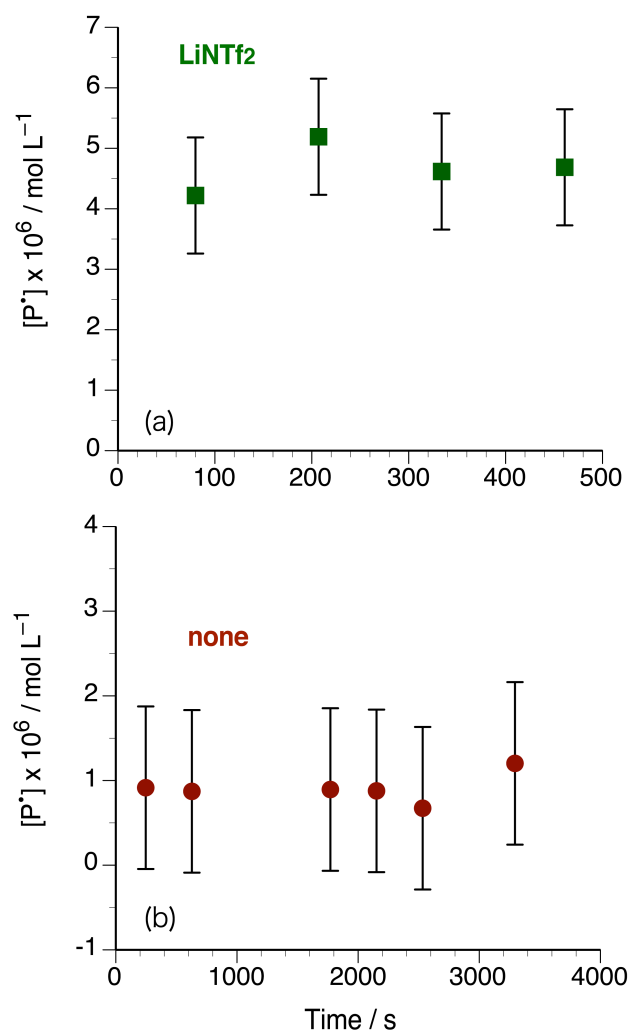

**Fig. S3.** Relationship between radical concentration and time in the NNPMAAm polymerization in  $\text{CH}_3\text{CN}$  at  $0^\circ\text{C}$  in the (a) presence and (b) absence of  $\text{LiNTf}_2$ .

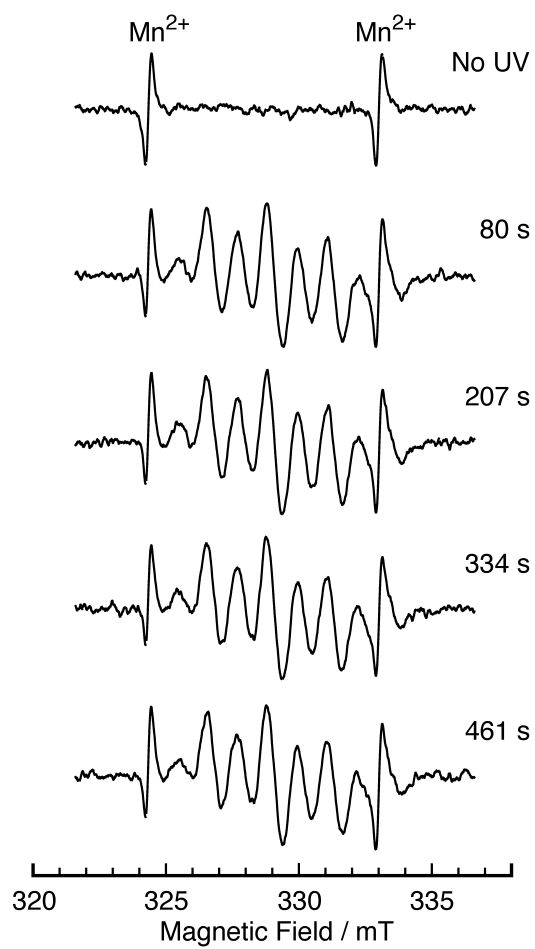

**Fig. S4.** ESR spectra of the NNPMAM polymerization in  $\text{CH}_3\text{CN}$  at  $0\text{ }^\circ\text{C}$  in the presence of  $\text{LiNTf}_2$ . Signals from the  $\text{Mn}^{2+}$  standard are shown at *ca.* 324 and 333 mT.

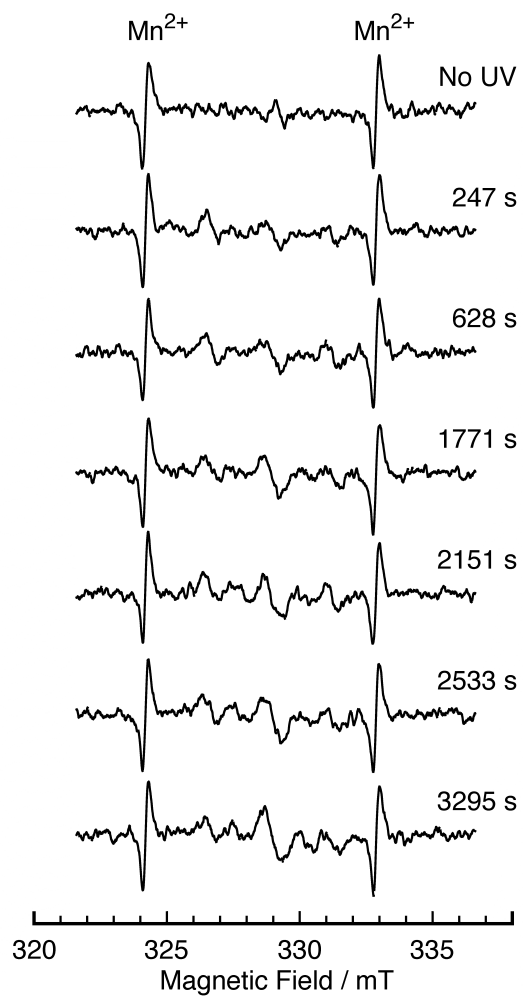

**Fig. S5.** ESR spectra of the NNPMAAm polymerization in  $CH_3CN$  at  $0\text{ }^\circ\text{C}$  in the absence of  $LiNTf_2$ . Signals from the  $Mn^{2+}$  standard are shown at *ca.* 324 and 333 mT.

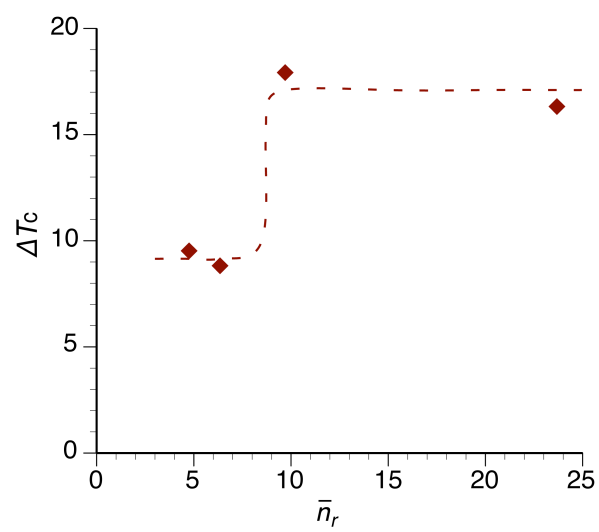

**Fig. S6.** Relationship between the  $\Delta T_c$  and  $\bar{n}_r$  values in syndiotactic-rich poly(NNPMAAm)s.
